# Supplementary material for: Functional analysis of peripheral and intratumoral neoantigen-specific TCRs identified in a patient with melanoma
Source: PubMed Central journal article supplement — J Immunother Cancer. 2021 Sep 12;9(9):e002754. doi: 10.1136/jitc-2021-002754 (PMC8438848; doi:10.1136/jitc-2021-002754), 2021-09-12
Supplement: jitc-2021-002754supp002.pdf [file jitc-2021-002754supp002.pdf]

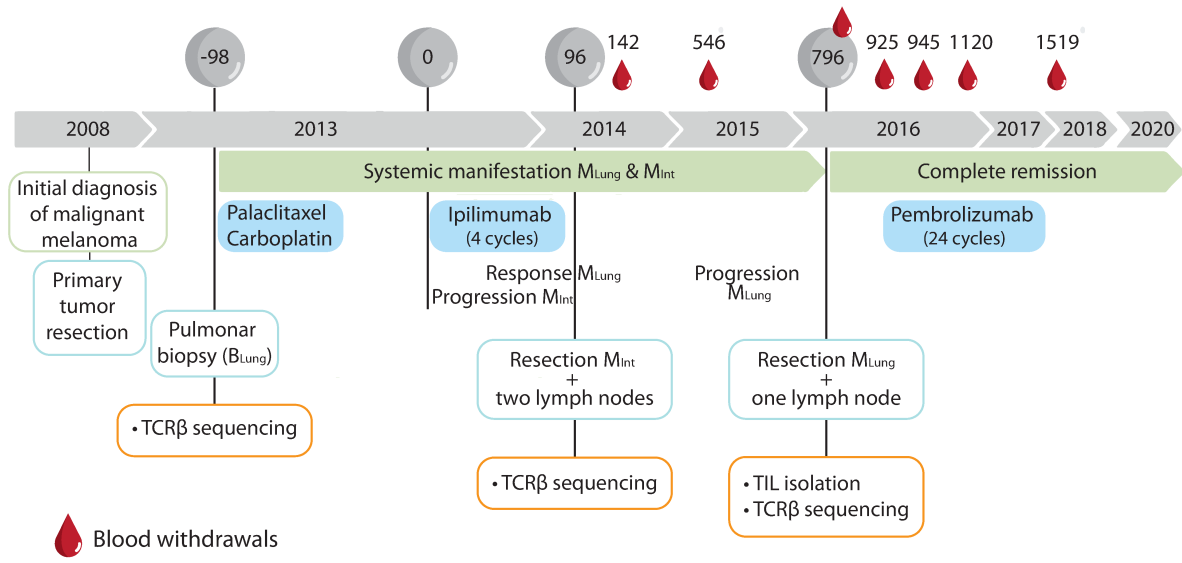

Figure S1

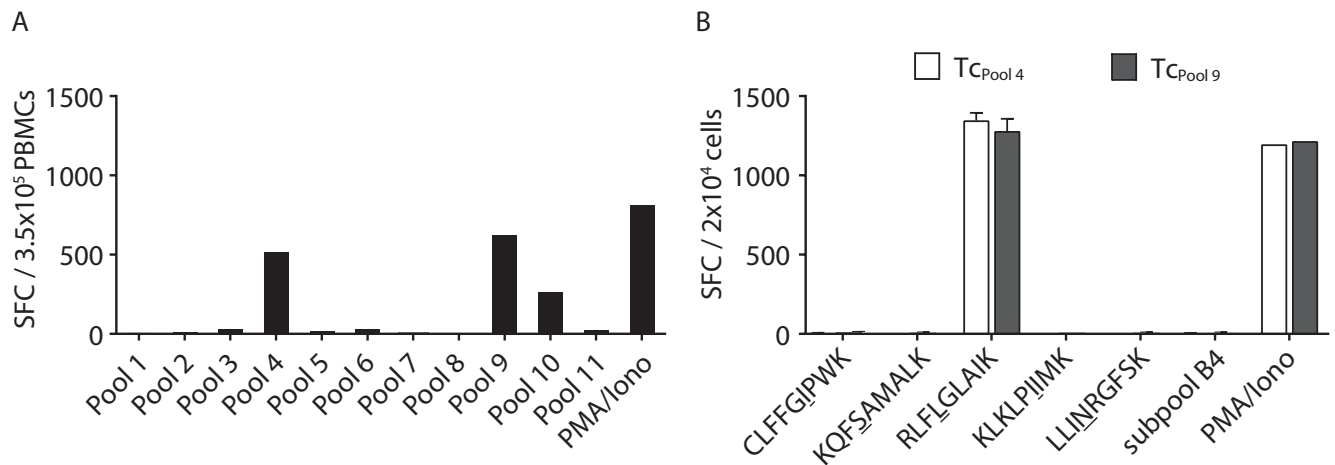

Figure S2

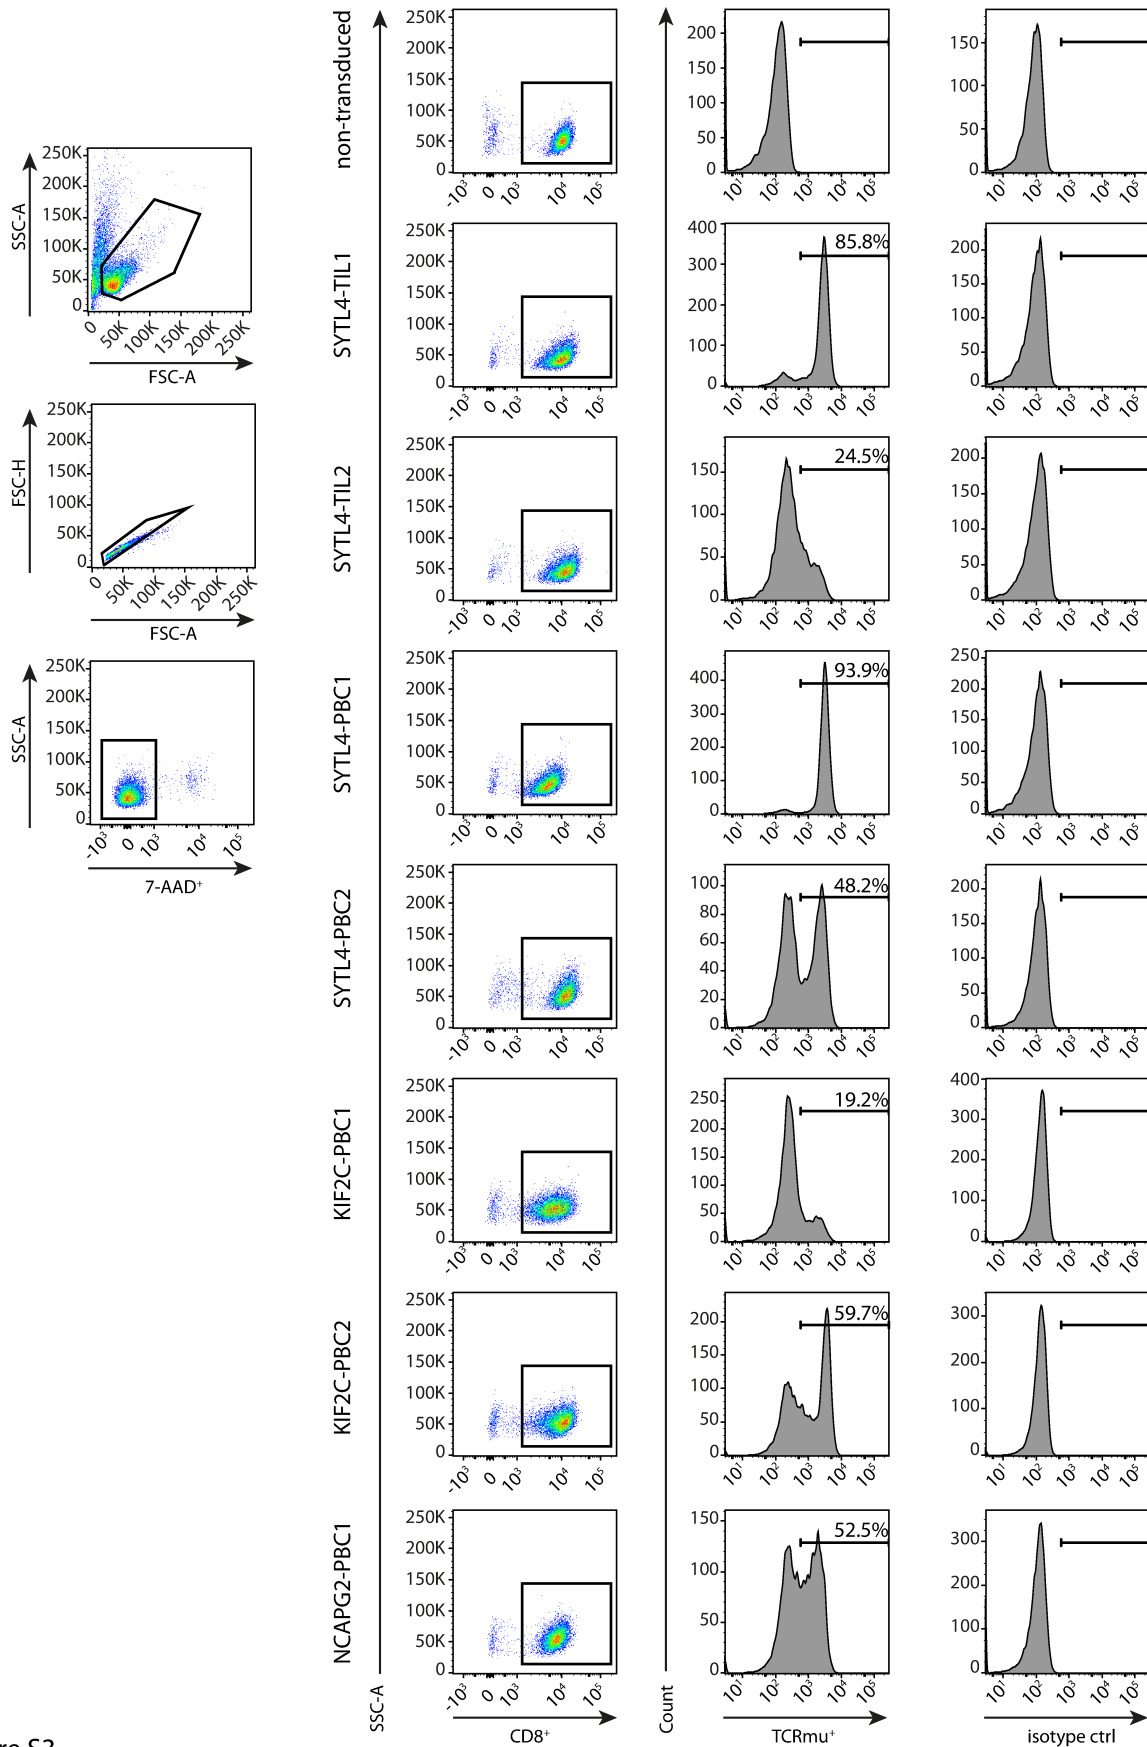

Figure S3

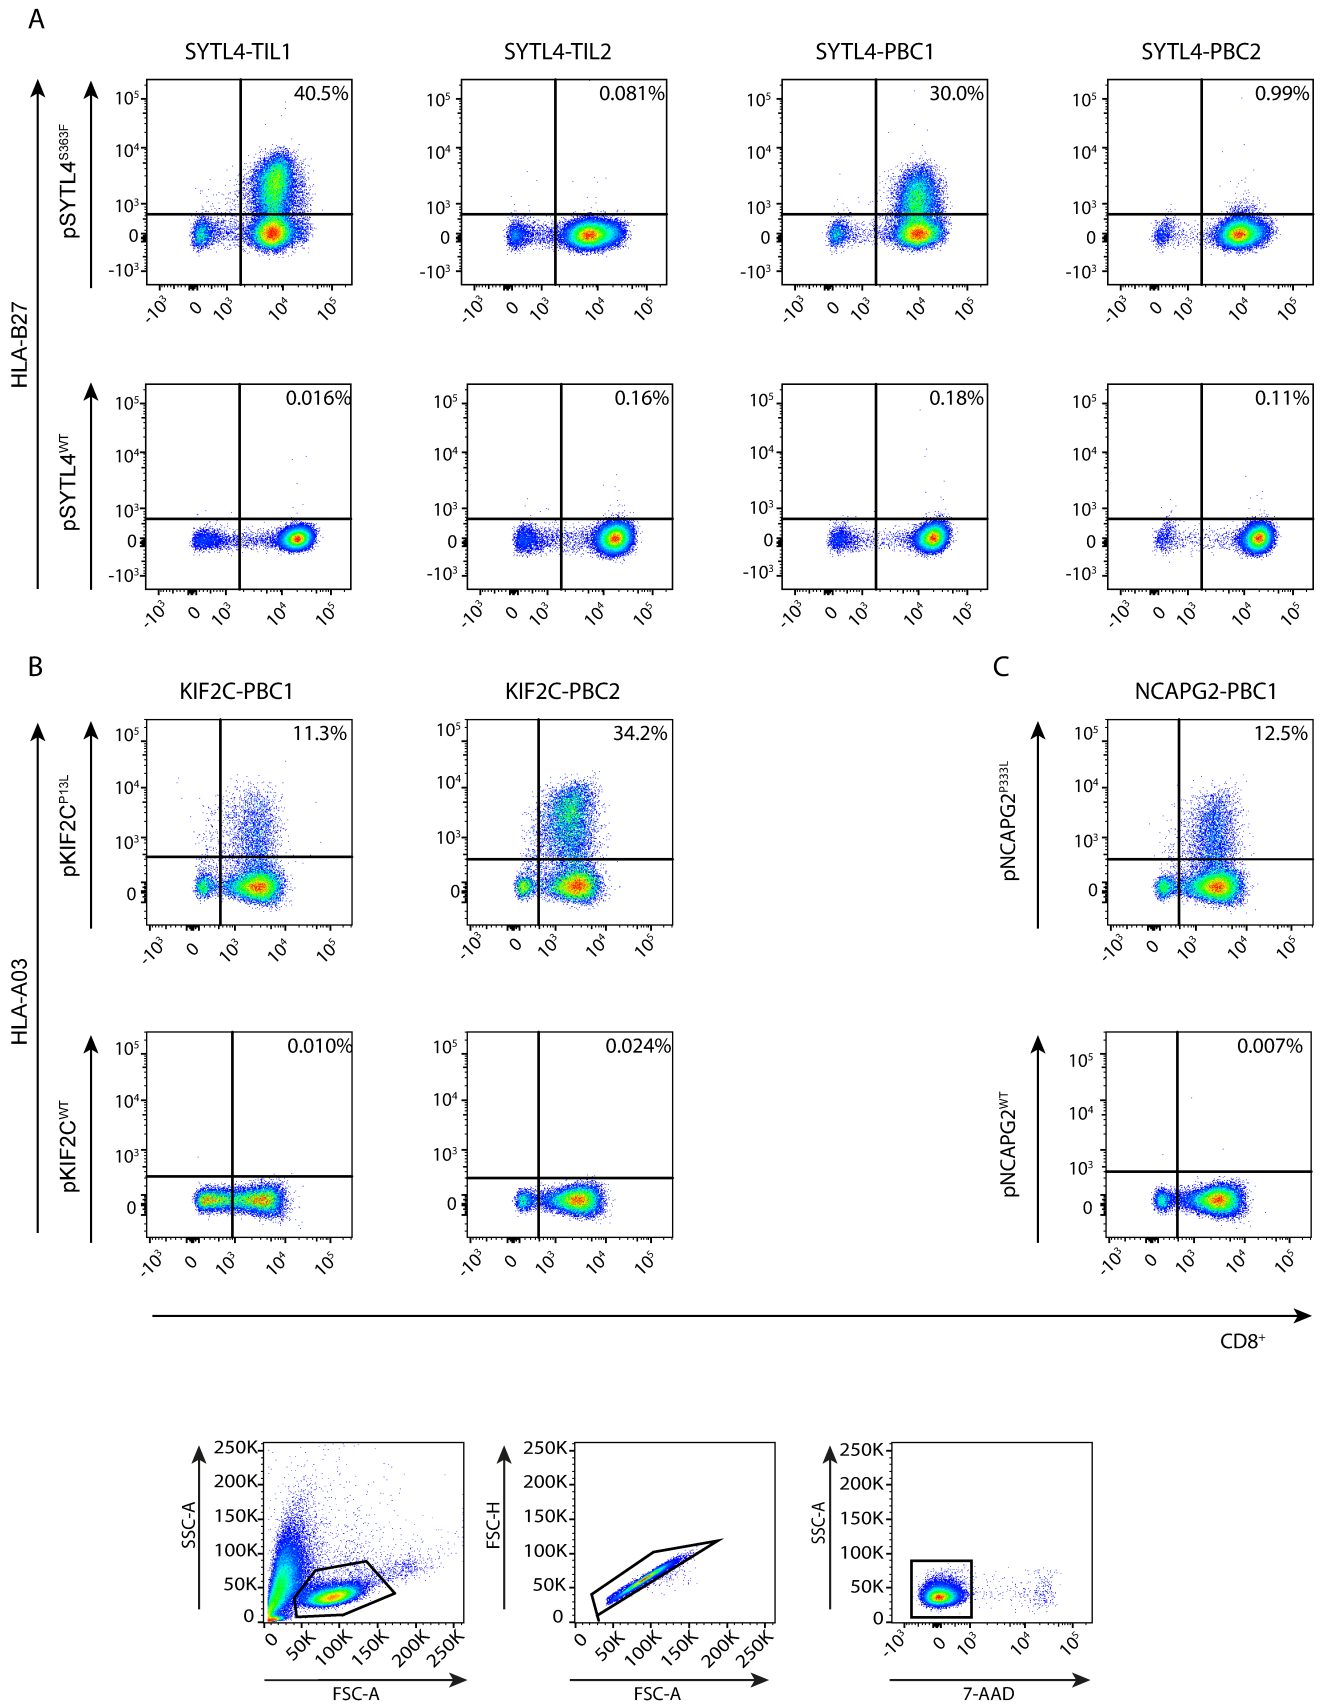

Figure S4

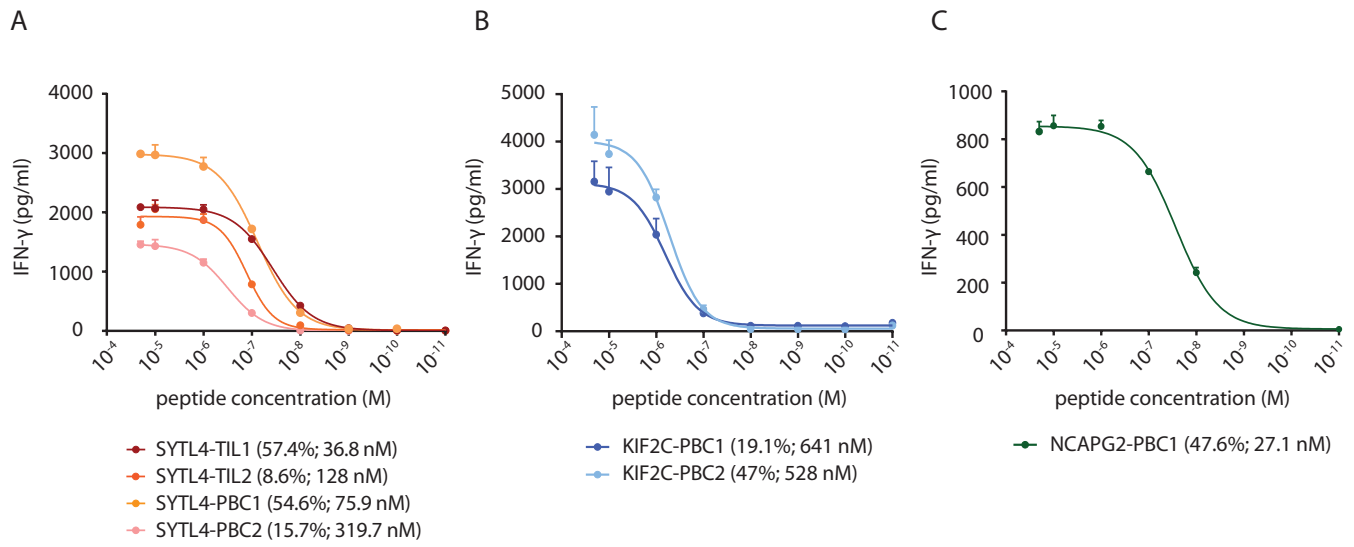

Figure S5

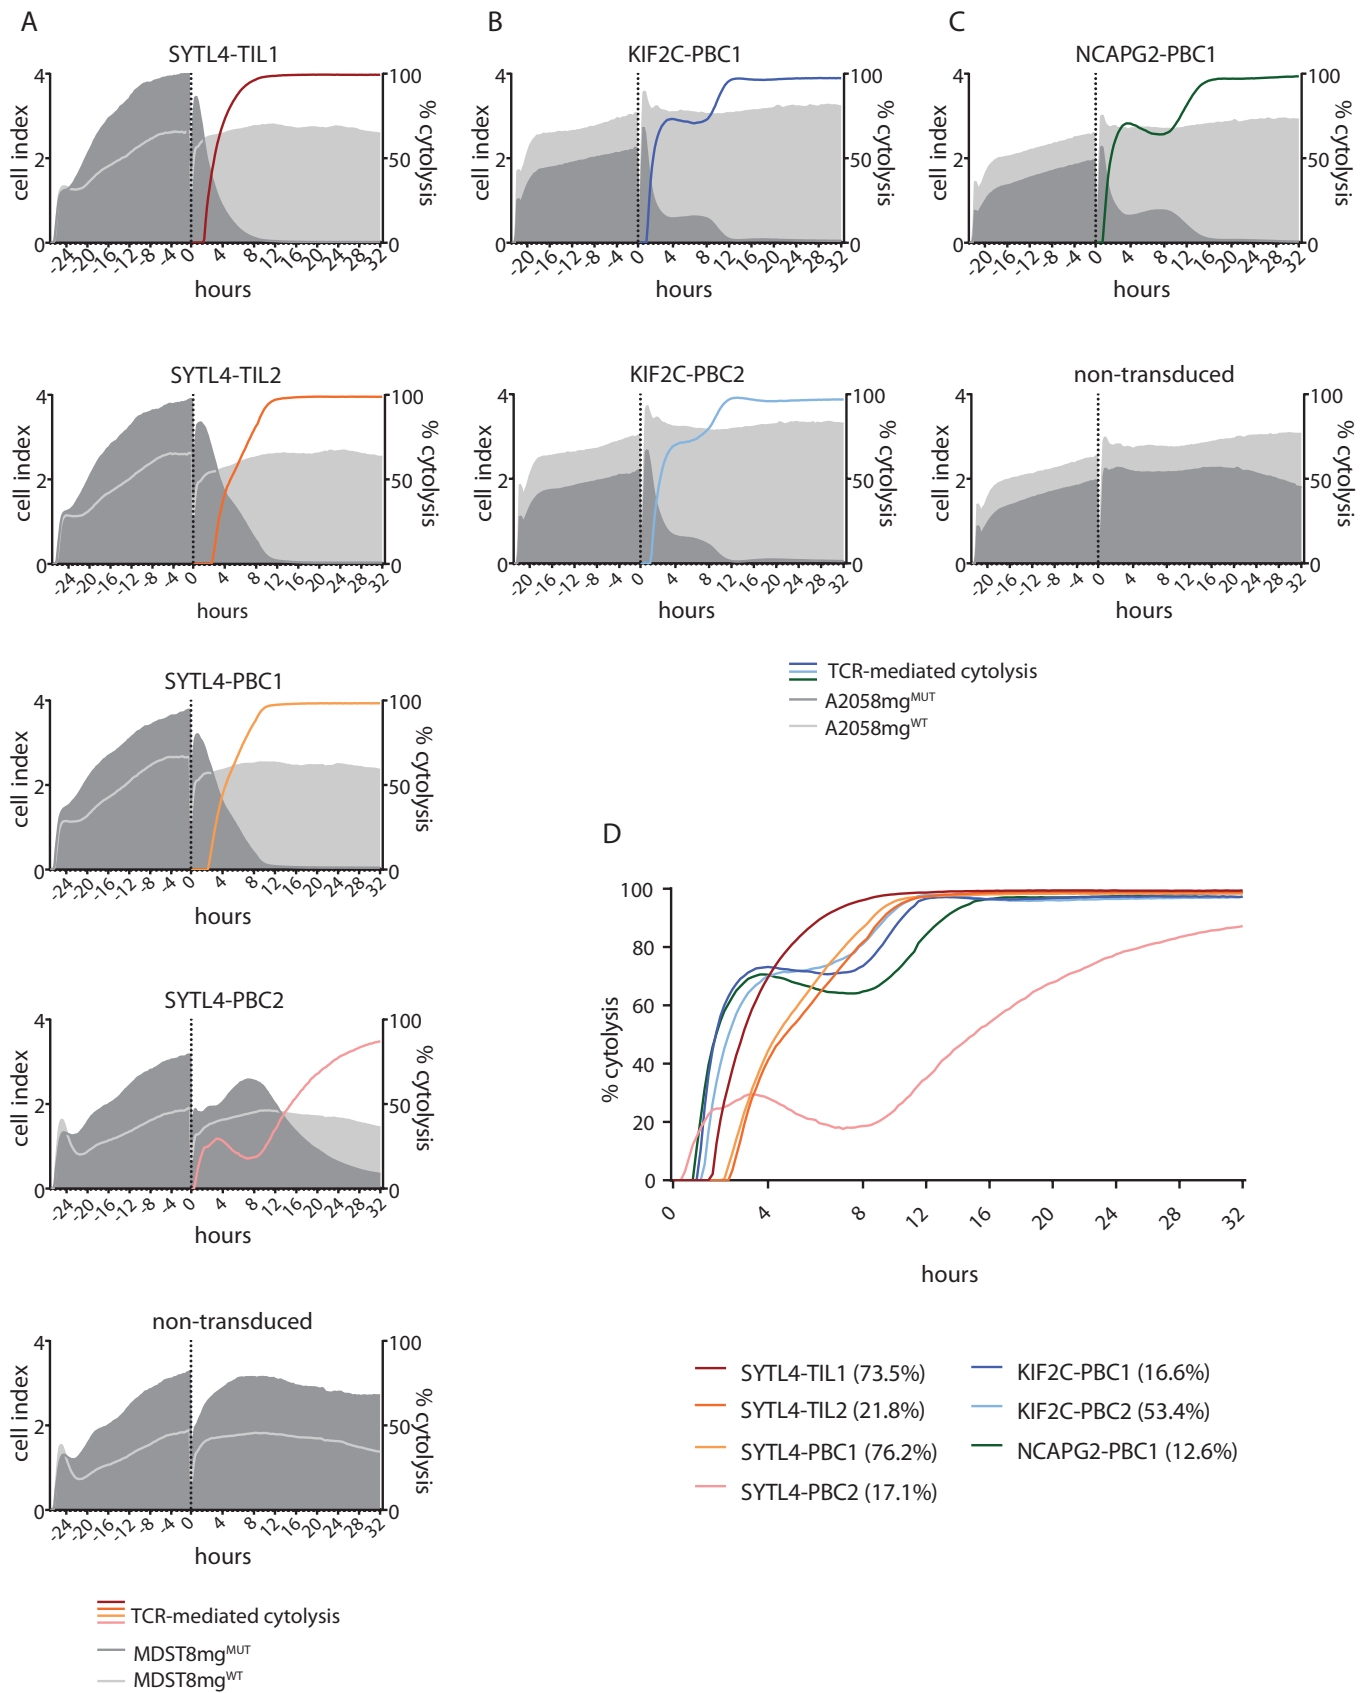

Figure S6

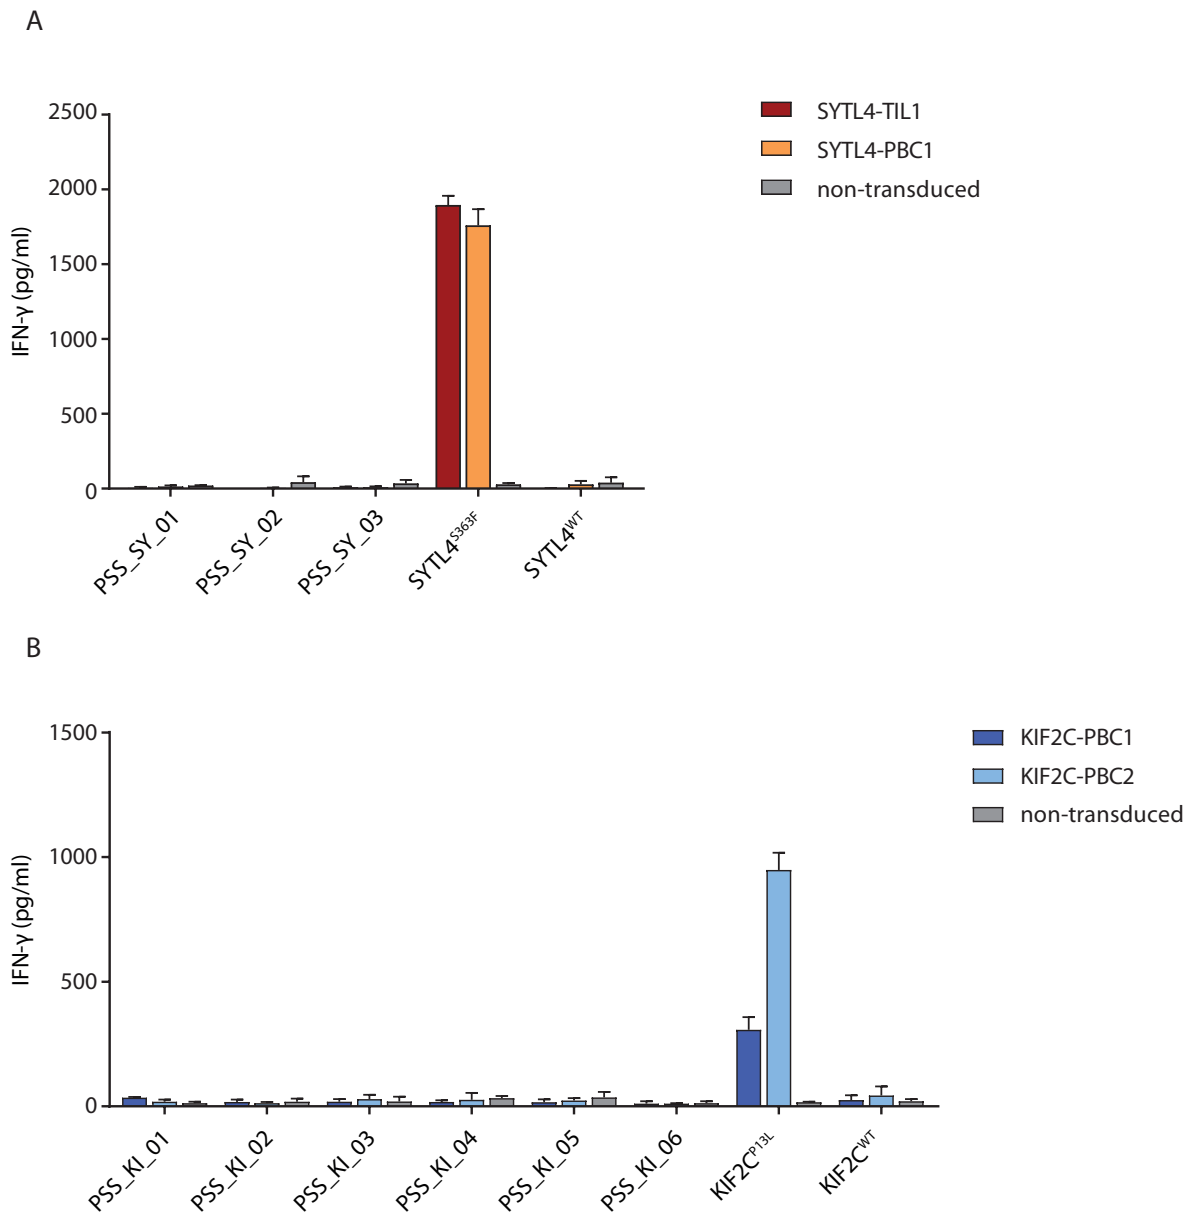

Figure S7

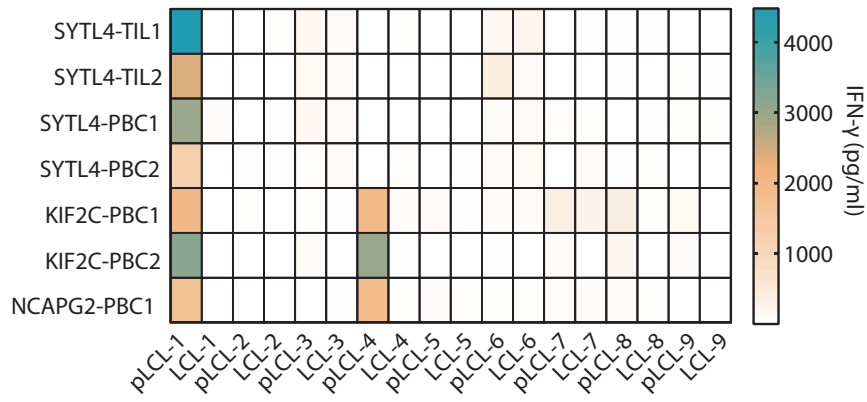

Figure S8



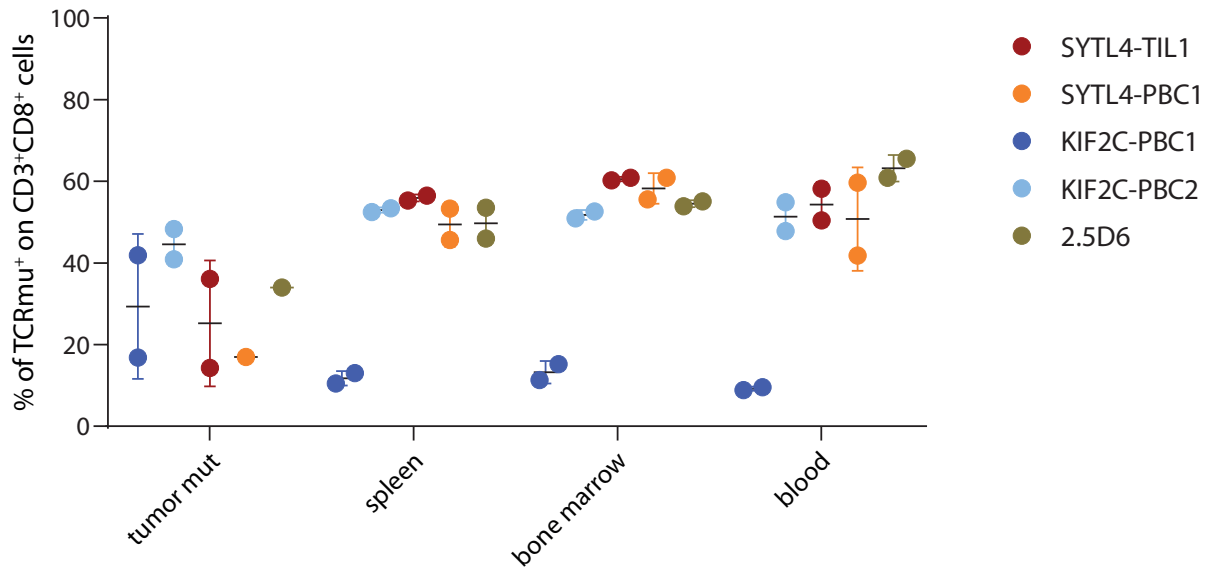

Figure S9



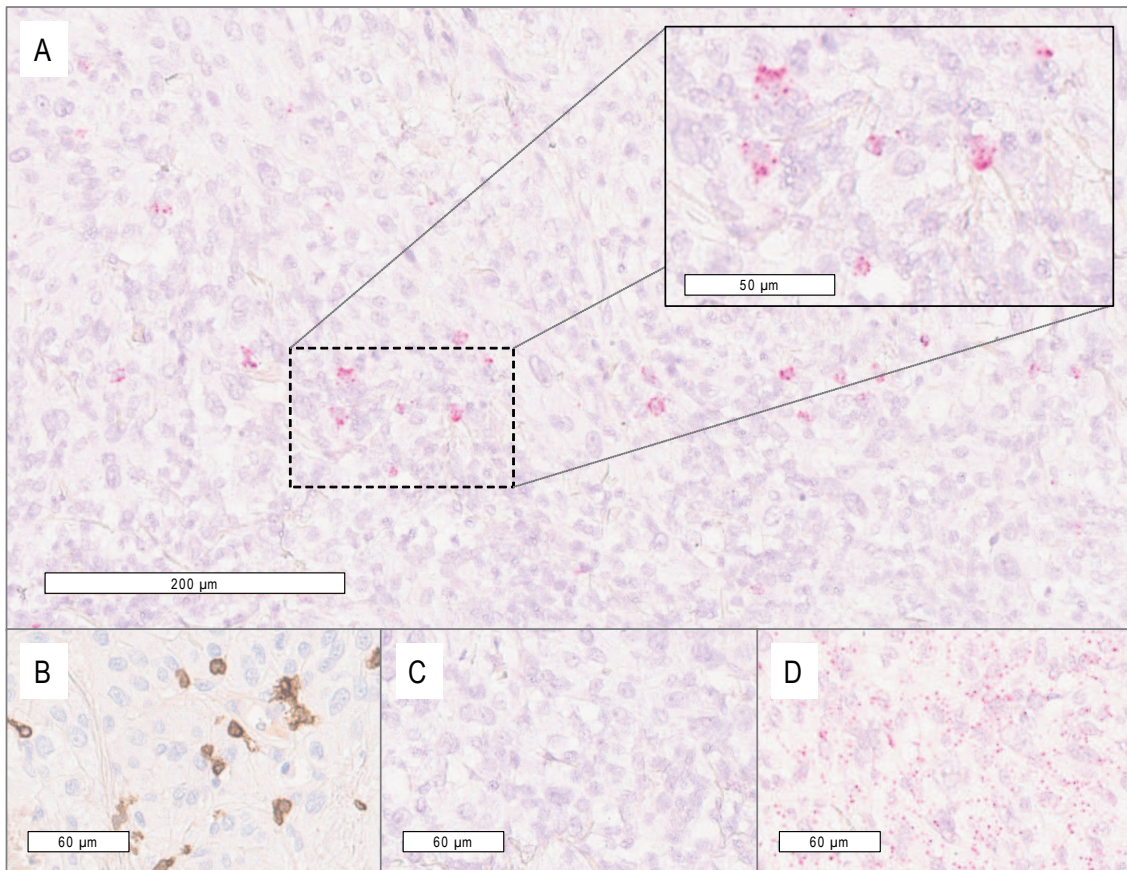

Figure S11

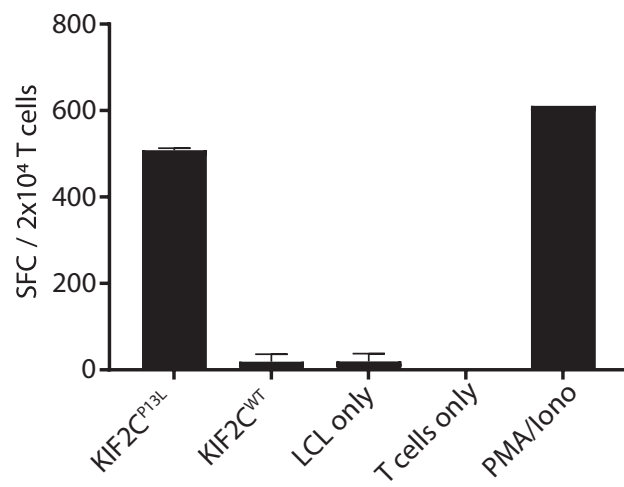

Figure S12

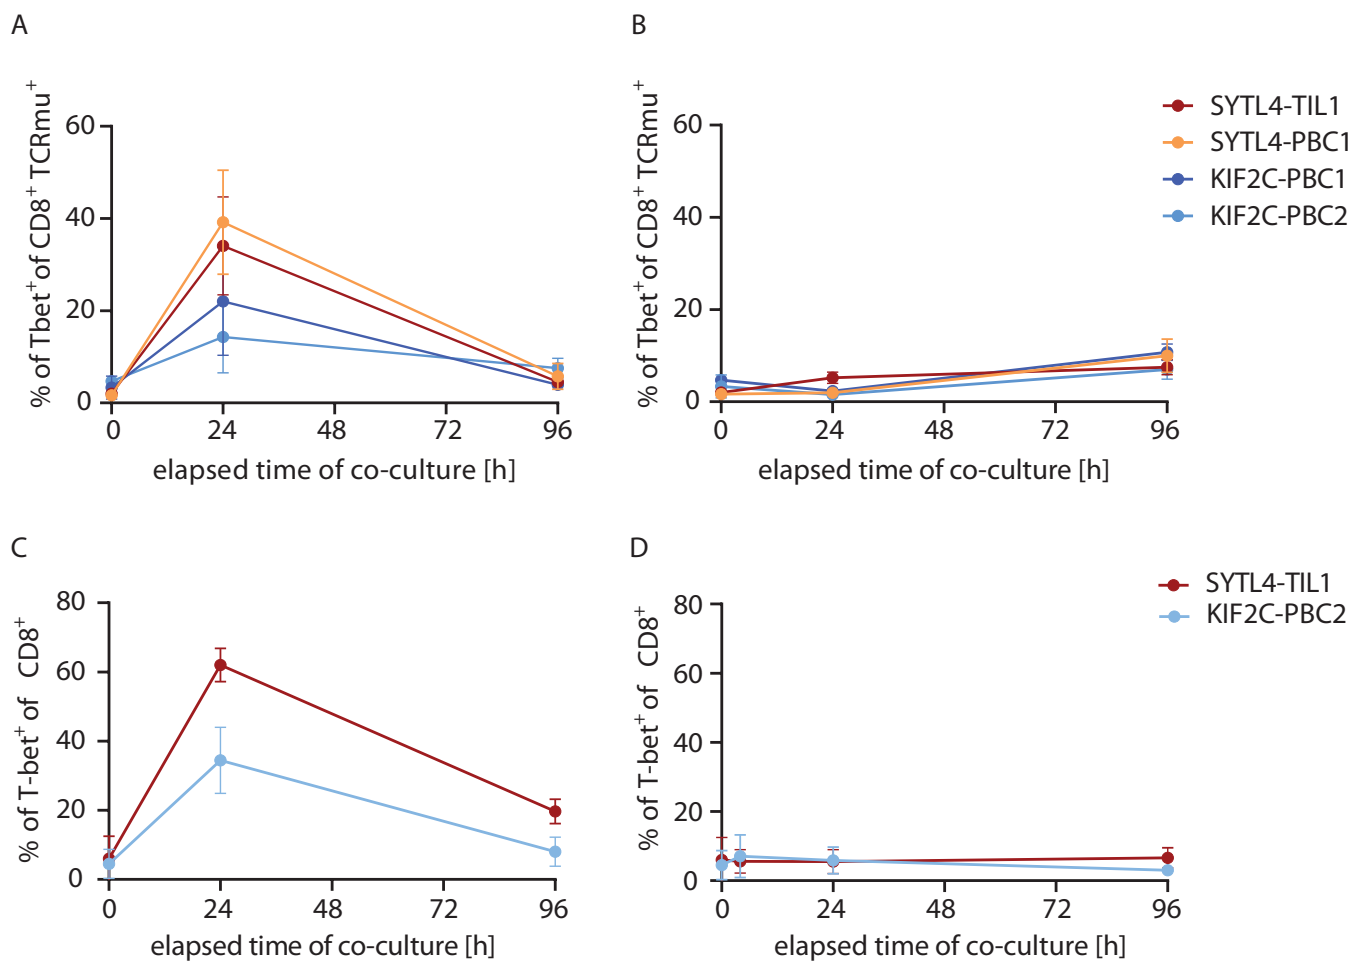

Figure S13
